# Supplementary material for: Endothelial dysfunction and transcriptome aberration in mouse aortas induced by black phosphorus quantum dots and nanosheets
Source: Royal Society of Chemistry journal article supplement (doi:10.1039/d1nr01965a), 2021-01-01
Supplement: d1nr01965a1.pdf [file d1nr01965a1.pdf]

## Supporting Information

### **Endothelial Dysfunction and Transcriptome Aberration in Mouse Aortas Induced by Black Phosphorus Quantum Dots and Nanosheets**

Jiayan Chen,<sup>a</sup> Liping Lu,<sup>a</sup> Chunlong Zhang,<sup>b</sup> Xiaoming Zhu,<sup>c</sup> and Shulin Zhuang\*<sup>a</sup>

<sup>a</sup> Key Laboratory of Environment Remediation and Ecological Health, Ministry of Education, College of Environmental and Resource Sciences, Zhejiang University, Hangzhou 310058, China

<sup>b</sup> Department of Environmental Sciences, University of Houston-Clear Lake, 2700 Bay Area Blvd., Houston, Texas 77058, USA

<sup>c</sup> Key Laboratory of Women's Reproductive Health Research of Zhejiang Province, Women's Hospital, School of Medicine, Zhejiang University, Hangzhou 310006, China

\* corresponding author: [shulin@zju.edu.cn](mailto:shulin@zju.edu.cn) (S. Z.)

A total of 11 pages including 2 tables and 8 figures

**Table S1.** The primers used for qPCR.

| <b>Gene</b> | <b>Primer Sequences (5' to 3')</b>                 |
|-------------|----------------------------------------------------|
| Human eNOS  | CCGAGTCCTCACCGCCTTCT<br>GGTAACATCGCCGCAGACAAA      |
| Human iNOS  | CCGAGGCAAACAGCACATTGAGAT<br>GAGTCCTGCACGAGCCTGTA   |
| Human GAPDH | CCATGACAACCTTTGGTATCGTGGAA<br>GGCCATCACGCCACAGTTTC |
| Mouse Myl4  | ACATCTCCCGCAACAAGG<br>TCTCCCAGGGTAGCAAGG           |
| Mouse Myh6  | GCAGGACCTGGTGGACAA<br>ACCTTGCGGAACTTGGAC           |
| Mouse Tnnc1 | TGACAGAGGAGCAGAAGAA<br>TGTAGCCATCAGCGTTTT          |
| Mouse GAPDH | CCTTCCGTGTTCTACCC<br>CAACCTGGTCCTCAGTGTAG          |

**Table S2.** The total DEGs and the number of upregulated or downregulated DEGs in aortas of mice after exposure to BP on day 1 and day 7 (BPQD\_1 and BPNS\_1 refer to 1 day after exposure to BP; BPQD\_7 and BPNS\_7 refer to 7 days after exposure to BP).

| <b>Treatment</b> | <b>Number of DEGs</b> | <b>Upregulation</b> | <b>Downregulation</b> |
|------------------|-----------------------|---------------------|-----------------------|
| BPQD_1           | 974                   | 781                 | 193                   |
| BPNS_1           | 1399                  | 1141                | 258                   |
| BPQD_7           | 1155                  | 475                 | 680                   |
| BPNS_7           | 1702                  | 1291                | 411                   |

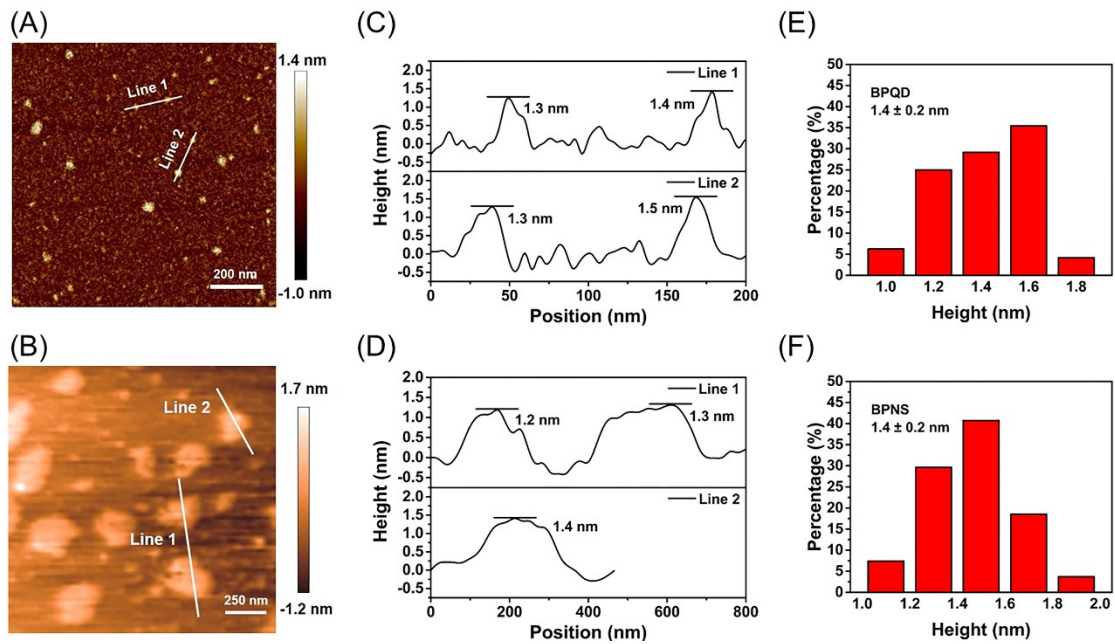

**Figure S1.** AFM characterization of BPQDs and BPNSs. Representative AFM topography of BPQDs (A) and BPNSs (B). (C) and (D) are height profiles along the white lines in (A) and (B), respectively. Statistical analysis of the heights of BPQDs (E) and BPNSs (F).

(A)

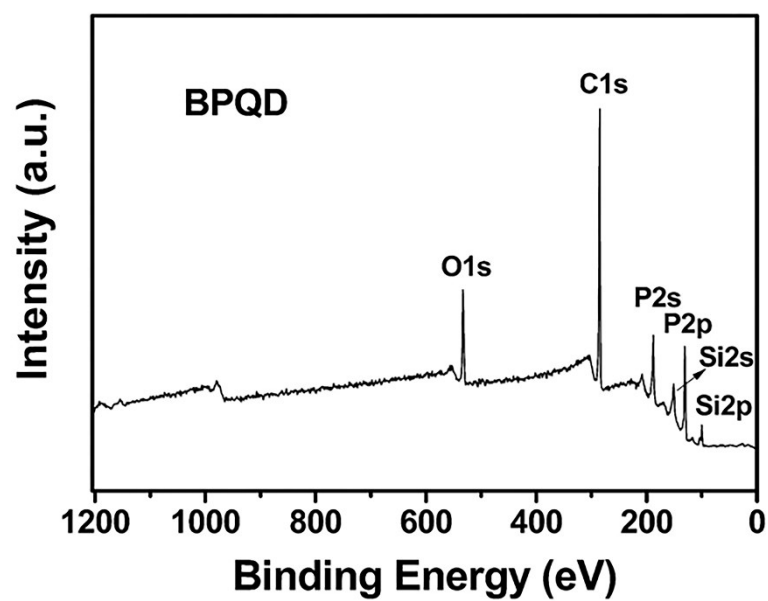

(B)

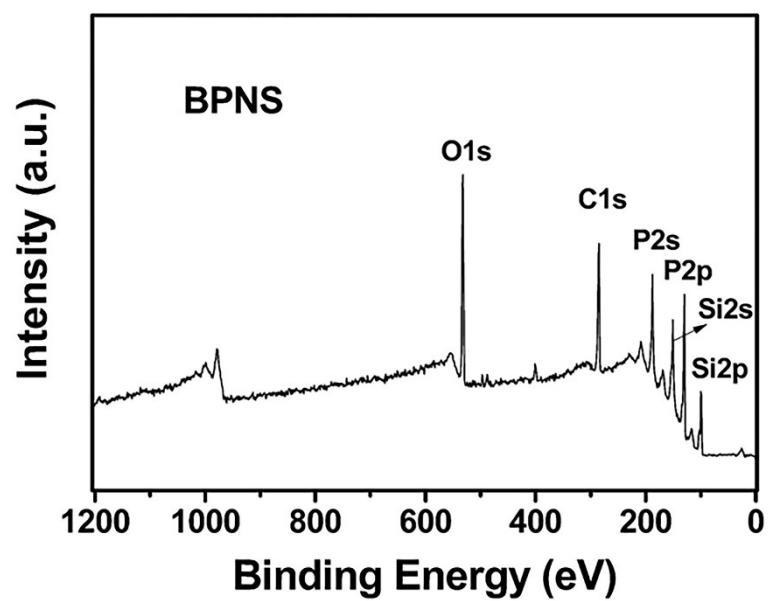

**Figure S2.** XPS spectra of BPQDs (A) and BPNSs (B).

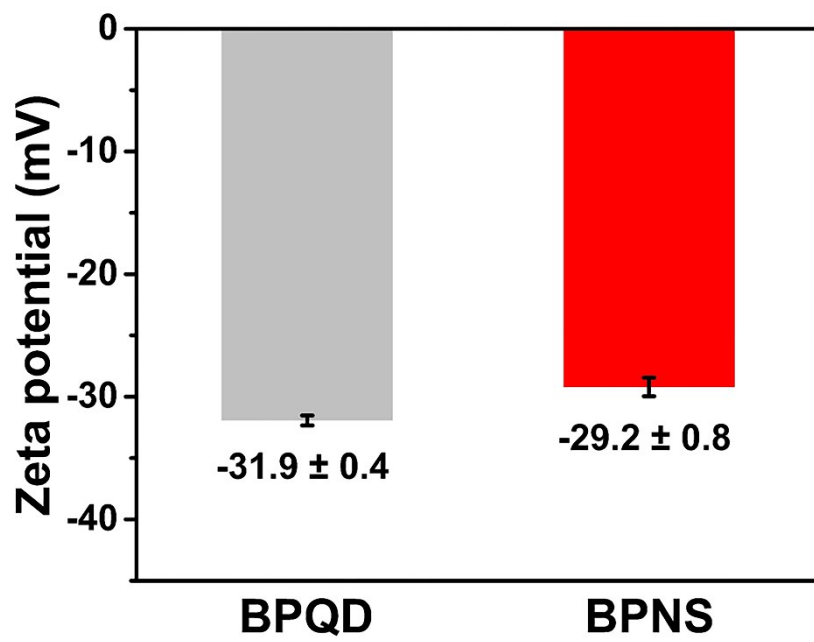

**Figure S3.** Zeta potential of BPQDs and BPNSs.

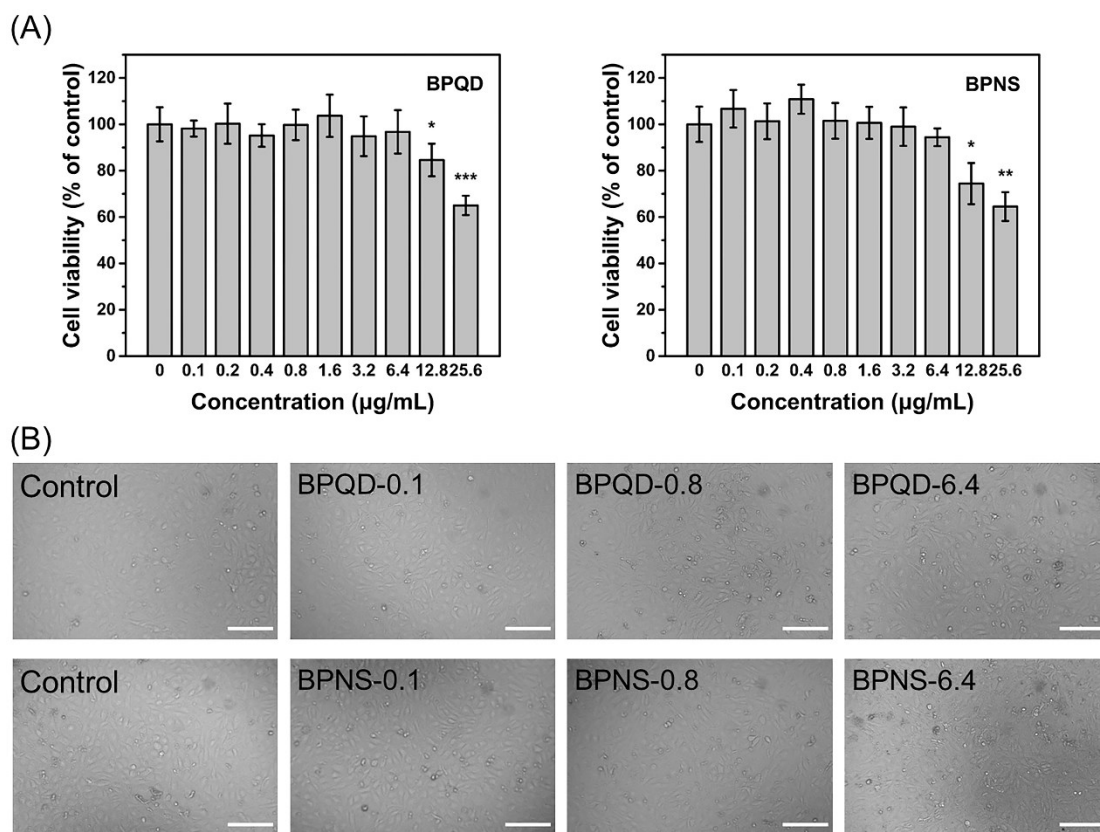

**Figure S4.** (A) Cell viability of HUVECs after 24 h incubation with BPQDs and BPNSs at different concentrations ranging from 0 to 25.6 µg/mL. (B) Representative optical microscopy images of HUVECs after 24 h incubation with BPQDs and BPNSs at 0.1, 0.8 and 6.4 µg/mL (Scale bar: 200 µm).

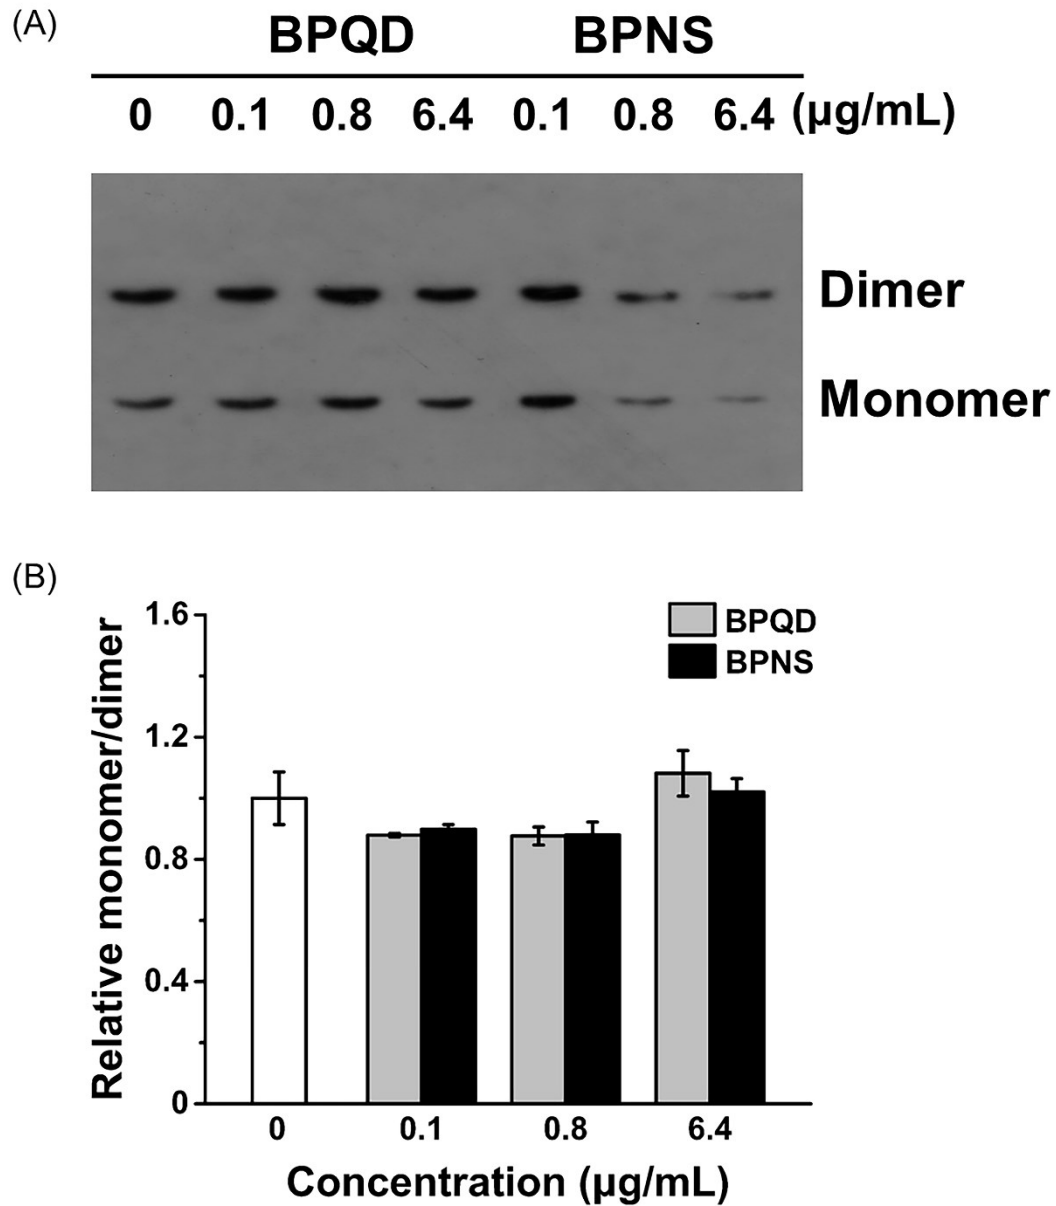

**Figure S5.** HUVECs were treated with BPQDs or BPNSs at the concentrations of 0.1, 0.8 and 6.4  $\mu\text{g/mL}$  for 24 h. (A) Dimeric and monomeric form of eNOS determined by western blot. (B) The relative ratio of monomer to dimer of eNOS. Data shown represent mean fold change ( $\pm$  SD) relative to untreated cell.



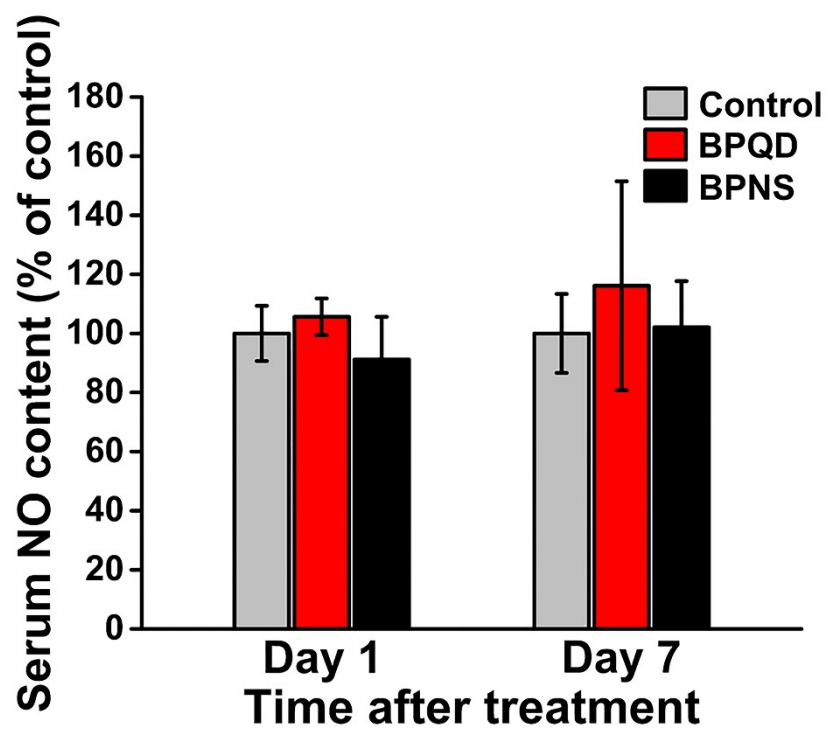

**Figure S6.** Serum NO level in mice intravenously injected with the BPQDs and BPNSs at 1 and 7 days post-administration.

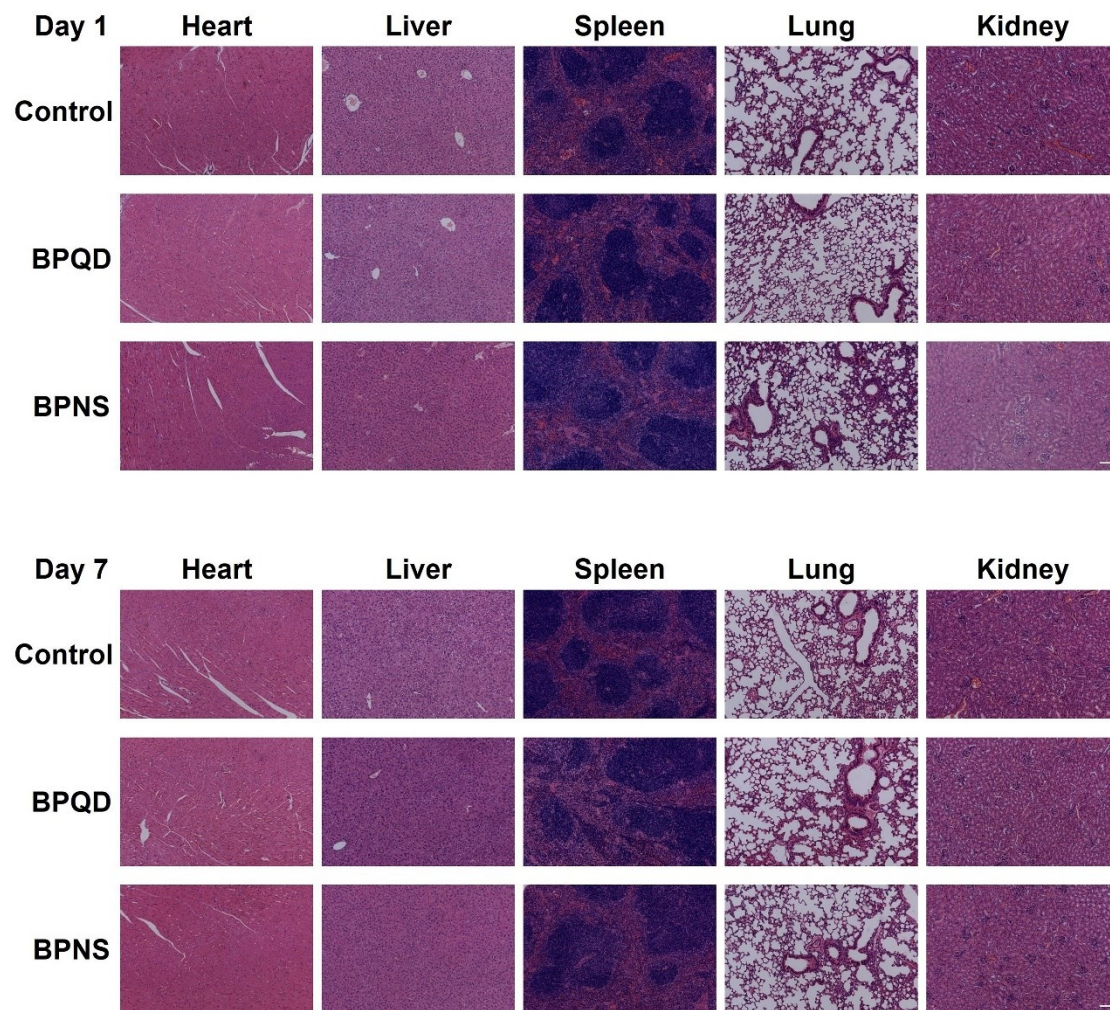

**Figure S7.** Histopathology evaluation following hematoxylin and eosin staining of heart, liver, spleen, lung, and kidney (Scale bar: 100  $\mu$ m).

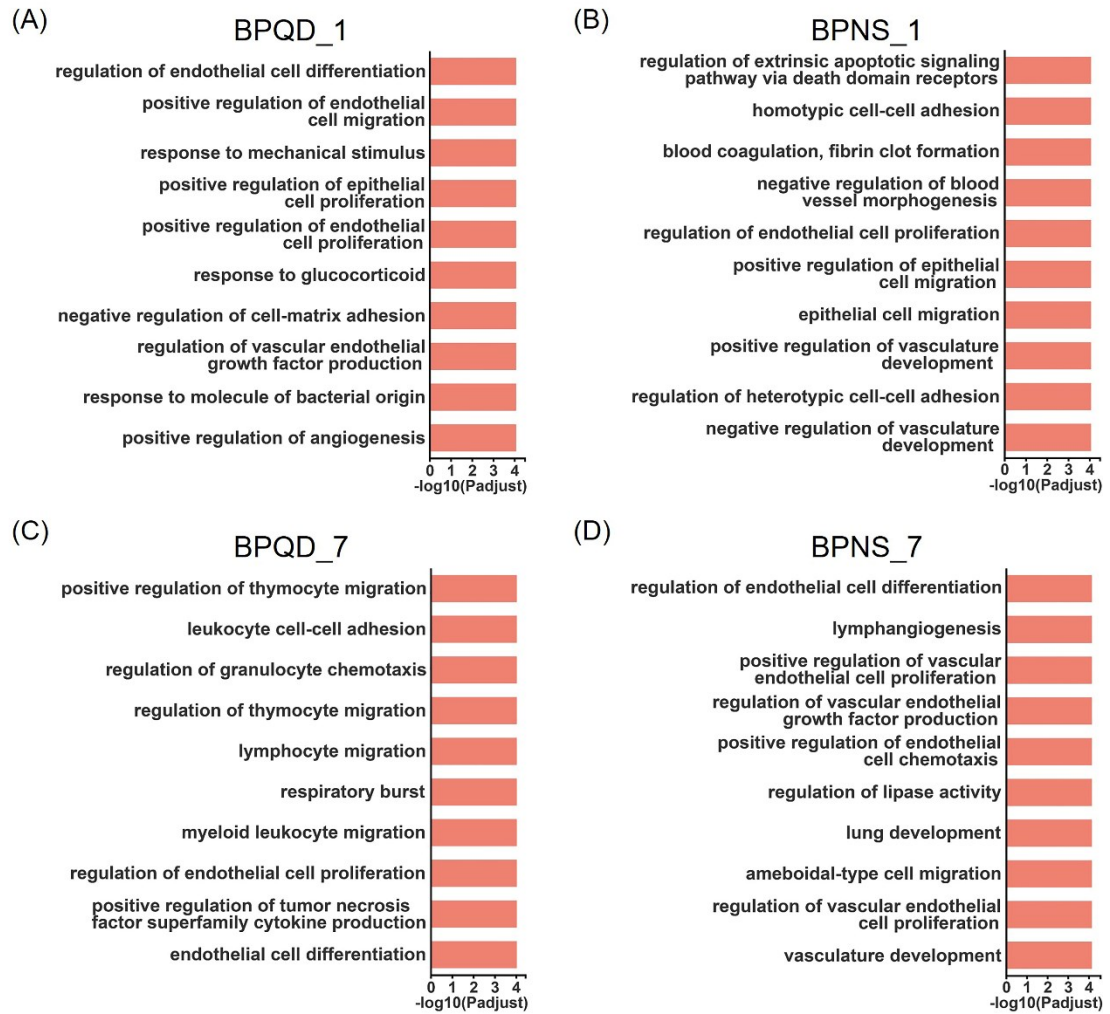

**Figure S8.** GO enrichment analysis of the endothelial-related DEGs affected by BPQDs (A) or BPNSs (B) 1 day after administration, and by BPQDs (C) or BPNSs (D) 7 days after administration.
